# Supplementary material for: Tetra-sensitive graft copolymer gels with high volume changes
Source: Royal Society of Chemistry journal article supplement (doi:10.1039/c6ra01857b), 2016-01-01
Supplement: c6ra01857b1.pdf [file c6ra01857b1.pdf]

**Electronic Supplementary Information**

# Tetra-sensitive Graft Copolymer Gels with High Volume Changes

*David Gräfe,<sup>abc</sup> Stefan Zschoche,<sup>a</sup> Dietmar Appelhans,<sup>\*a</sup> and Brigitte Voit<sup>\*abc</sup>*

<sup>a</sup> Leibniz-Institut für Polymerforschung Dresden e. V., Hohe Straße 6, 01069 Dresden, Germany.

<sup>b</sup> Technische Universität Dresden, Chair of Organic Chemistry of Polymers, 01062 Dresden, Germany.

<sup>c</sup> Technische Universität Dresden, Cluster of Excellence 'Center for Advancing Electronics Dresden', 01062 Dresden, Germany.

E-mail: applhans@ipfdd.de; voit@ipfdd.de

### Control experiment to exclude degradation of the azide end-group

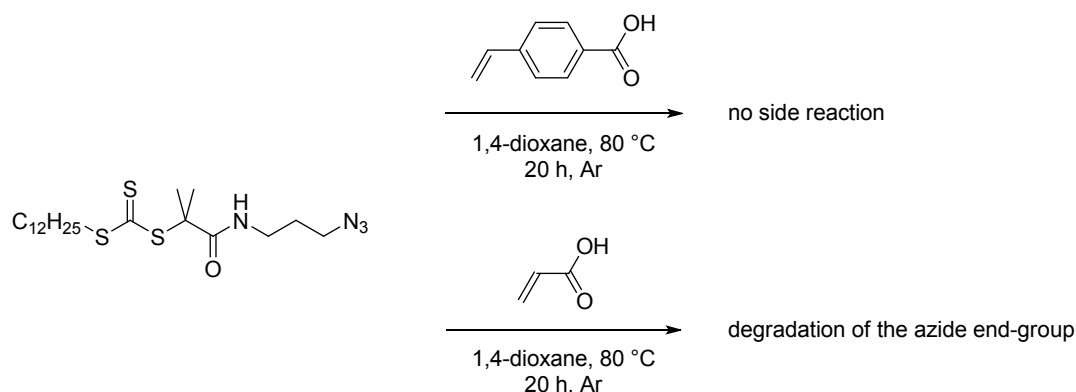

**Scheme SI-1.** Control experiment to exclude the loss of the azide end-group after polymerization of vinylbenzoic acid (top) and acrylic acid (bottom)

In order to exclude the loss of the azide end-group after polymerization, a control experiment was carried out wherein the reaction of the azide functionalized chain transfer agent with 4-vinylbenzoic acid and acrylic acid was tested. Due to the fact that DMF is difficult to remove completely from the reaction mixture 1,4-dioxane was used (**Scheme SI-1**). The reaction mixture was investigated by FTIR before and after conducting the control experiment. In **Figure SI-1** (left) the FTIR spectrum with acrylic acid is shown and reveals that the azide stretch at  $2100\text{ cm}^{-1}$  is completely degraded. In contrast, no degradation of the azide stretch with 4-vinylbenzoic acid is detected (**Figure SI-1**; right). For this reason, we decided to use 4-vinylbenzoic acid as monomer for the synthesis of the macromonomer.

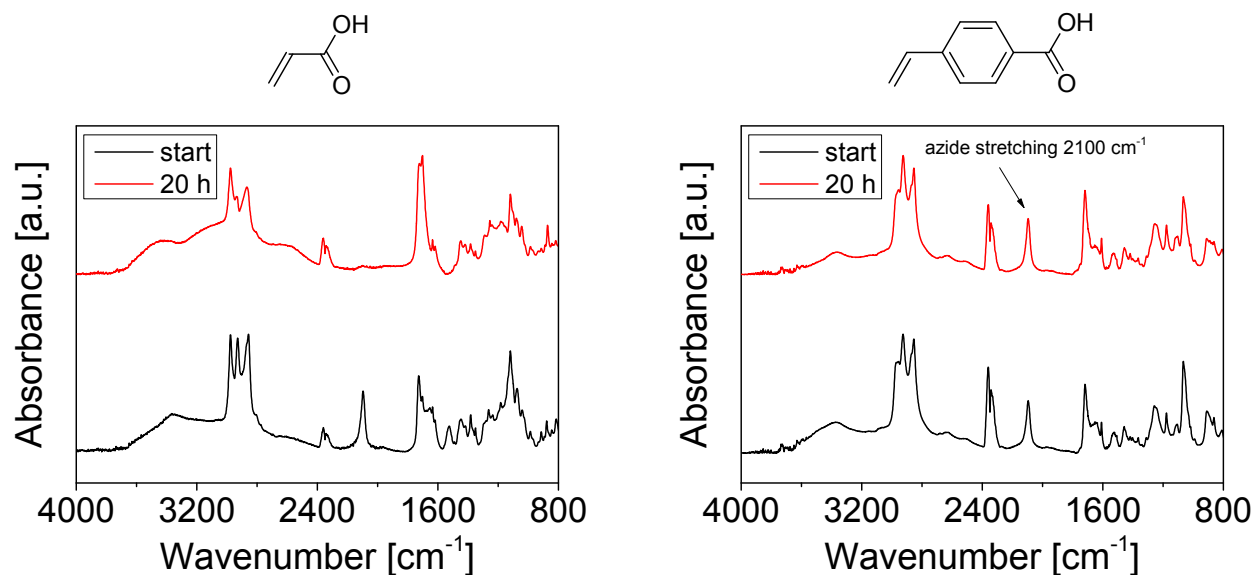

**Figure SI-1.** FTIR spectra of the reaction mixture before and after the control experiment using acrylic acid (left) and 4-vinylbenzoic acid (right).

#### Further analytic information of PVBA- $\text{N}_3$ and PVBA-AAm

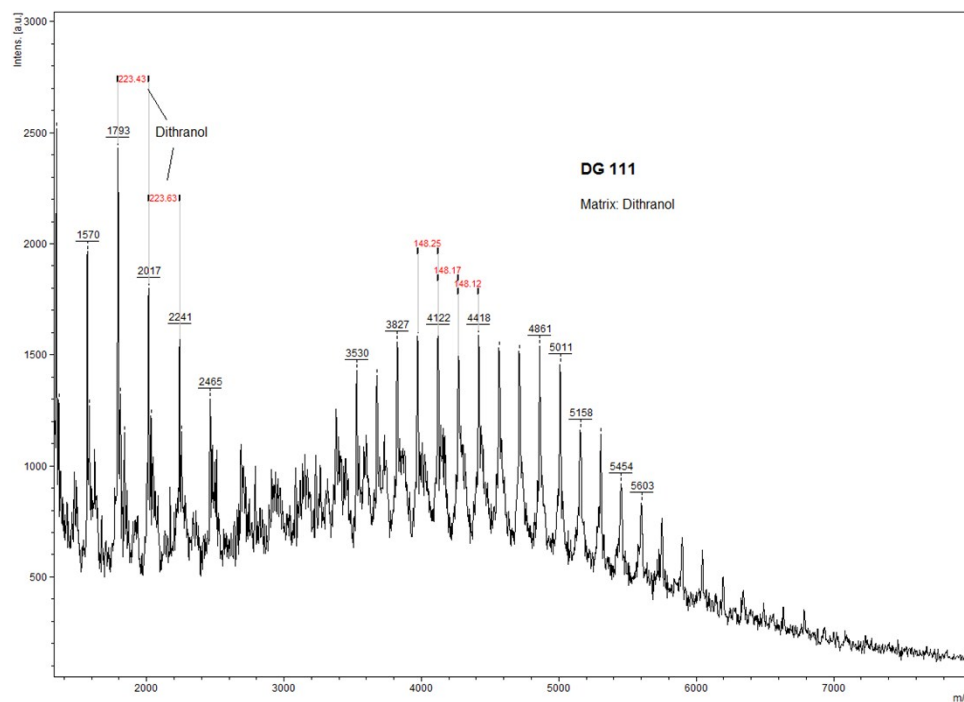

**Figure SI-2.** MALDI TOF MS spectrum of PVBA- $\text{N}_3$ .

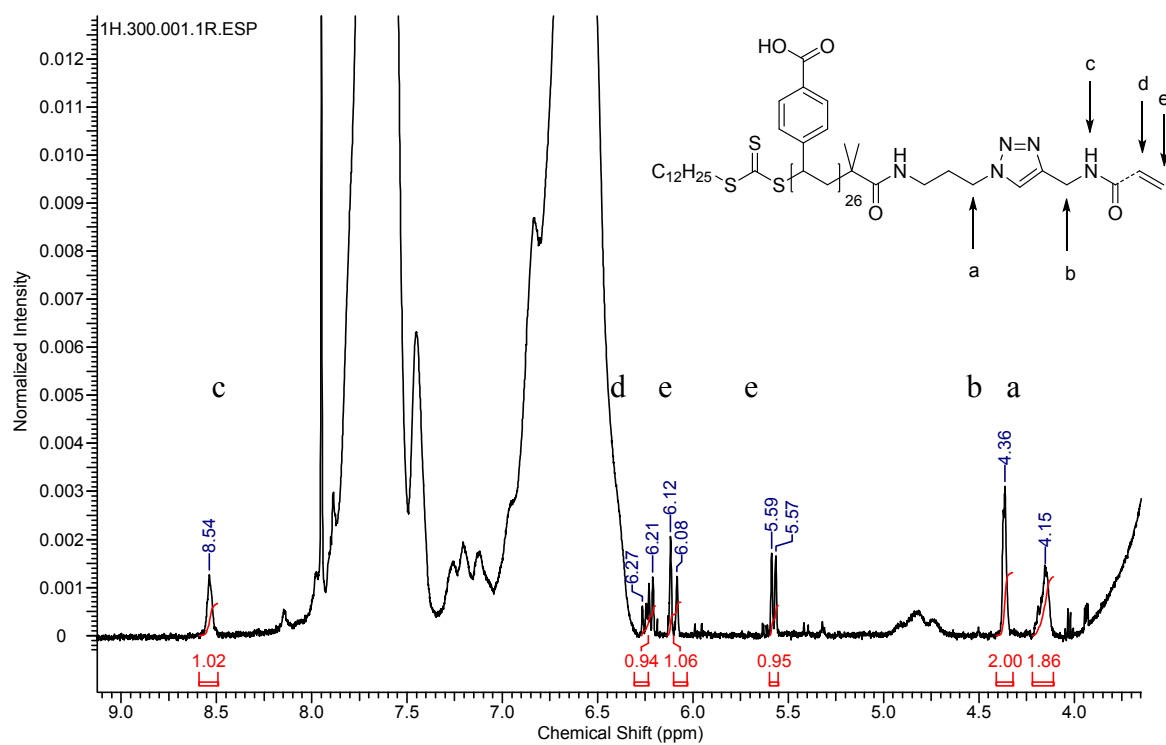

**Figure SI-3.** Selected and magnified part of the <sup>1</sup>H NMR spectrum of PVBA-AAm.

### Determination of the hydrogel composition

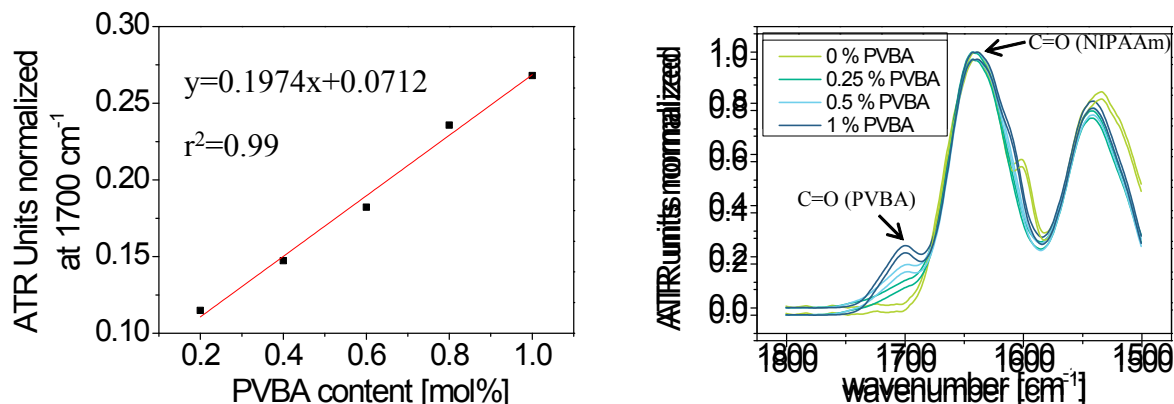

**Figure SI-4.** (Left) Normalized ATR Units at 1700 cm<sup>-1</sup> as a function of PVBA content. (Right) Selected and magnified part of the IR spectrum of the prepared *net*-PNIPAAm and *net*-PNIPAAm-*g*-PVBA hydrogels.

The characteristic band of the C=O stretch of PVBA is shown in figure 3 right at 1700 cm<sup>-1</sup>. The intensity of this band was normalized using the C=O stretching of NIPAAm at 1645 cm<sup>-1</sup>. Then, a calibration curve was prepared using mixed samples of PVBA and NIPAAm in the predetermined weight ratio. The resulting calibration curve is given in figure 3 left and was used to quantify the hydrogel composition of the prepared hydrogels (**Table SI-1**).

**Table SI-1.** Determined hydrogel composition by FTIR spectroscopy

| sample      | ATR units<br>at 1700 cm <sup>-1</sup> | PVBA<br>content<br>[mol%] | grafting<br>efficiency<br>[%] | Ratio of     |           |
|-------------|---------------------------------------|---------------------------|-------------------------------|--------------|-----------|
|             |                                       |                           |                               | NIPAAm units | VBA units |
| 0 % PVBA    | -                                     | -                         | -                             | 100          | -         |
| 0.25 % PVBA | 0.107                                 | 0.18                      | 72                            | 96           | 4         |
| 0.5 % PVBA  | 0.168                                 | 0.49                      | 99                            | 89           | 11        |
| 1 % PVBA    | 0.244                                 | 0.87                      | 87                            | 82           | 18        |

### Further analytic information of the prepared *net*-PNIPAAm-*g*-PVBA

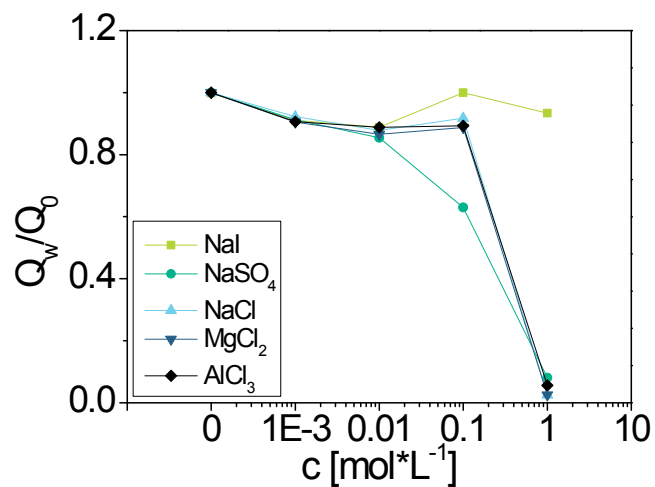

**Figure SI-5.** Change in swelling as function of various salts at different concentrations for *net*-PNIPAAm.

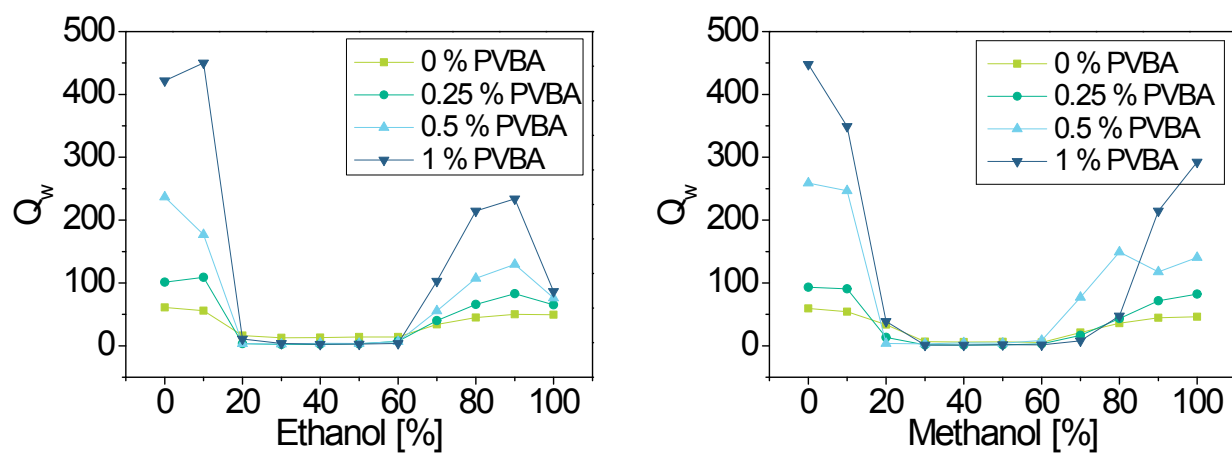

**Figure SI-6.** Equilibrium swelling behaviour at r.t. as function of ethanol concentration (left) and methanol concentration (right).

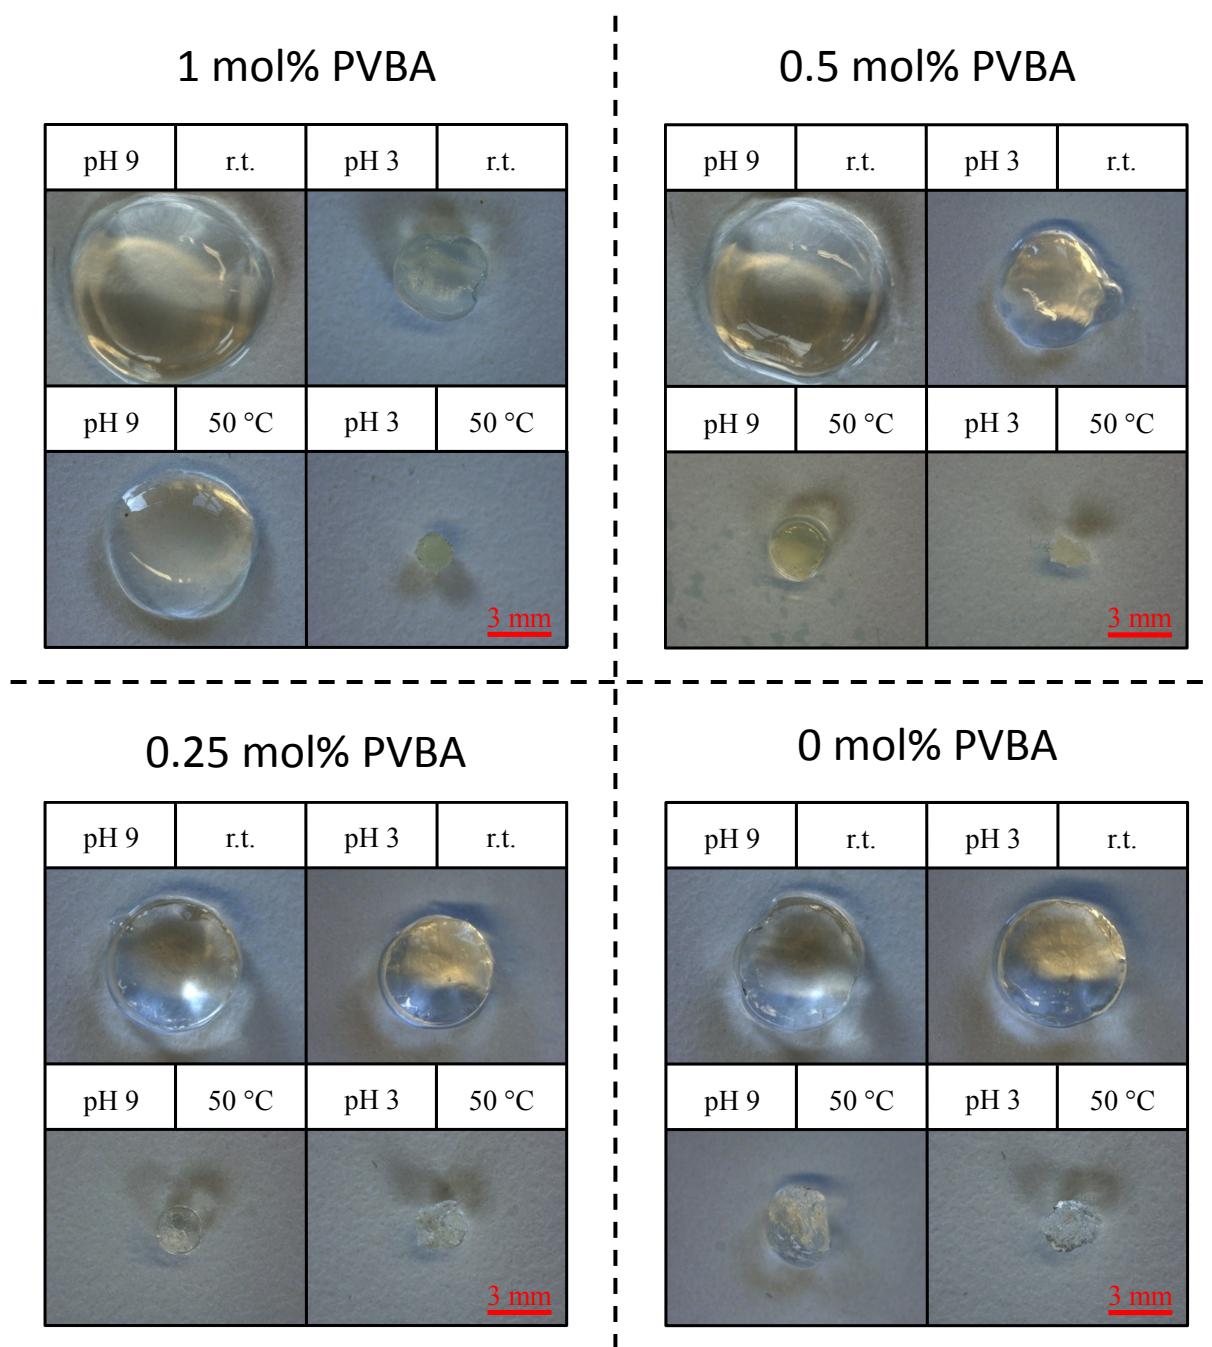

**Figure SI-7.** Microscope images of the prepared *net*-PNIPAAm and *net*-PNIPAAm-*g*-PVBA.
